# Supplementary material for: Prognostic Role of miR-221 and miR-222 Expression in Cancer Patients: A Systematic Review and Meta-Analysis
Source: MDPI journal article supplement (doi:10.3390/cancers11070970), 2019-07-11
Supplement: s1 [file s1]

# Supplementary Materials: Prognostic role of miR-221 and miR-222 expression in cancer patients: A systematic review and meta-analysis

Gloria Ravegnini, Sarah Cargnin, Giulia Sammarini, Federica Zanotti, Justo Lorenzo Bermejo, Patrizia Hrelia, Salvatore Terrazzino and Sabrina Angelini

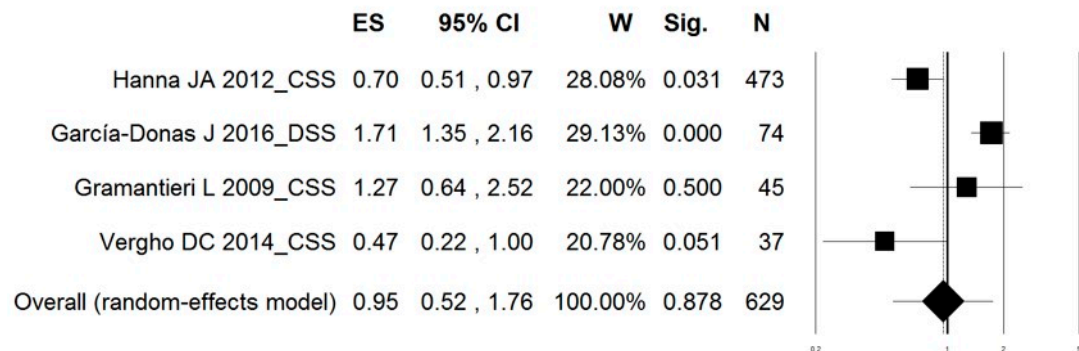

**Figure S1.** Forest plots for the effect of miR-221 overexpression and CSS and DSS

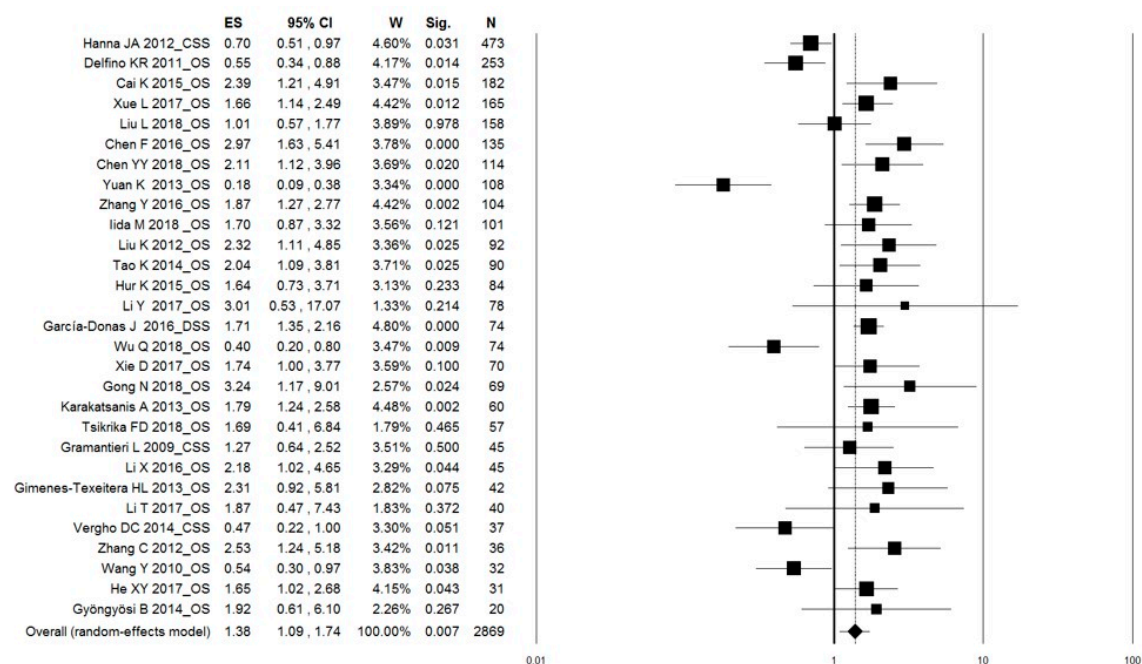

**Figure S2.** Forest plots for the effect of miR-221 overexpression and OS/CSS/DSS

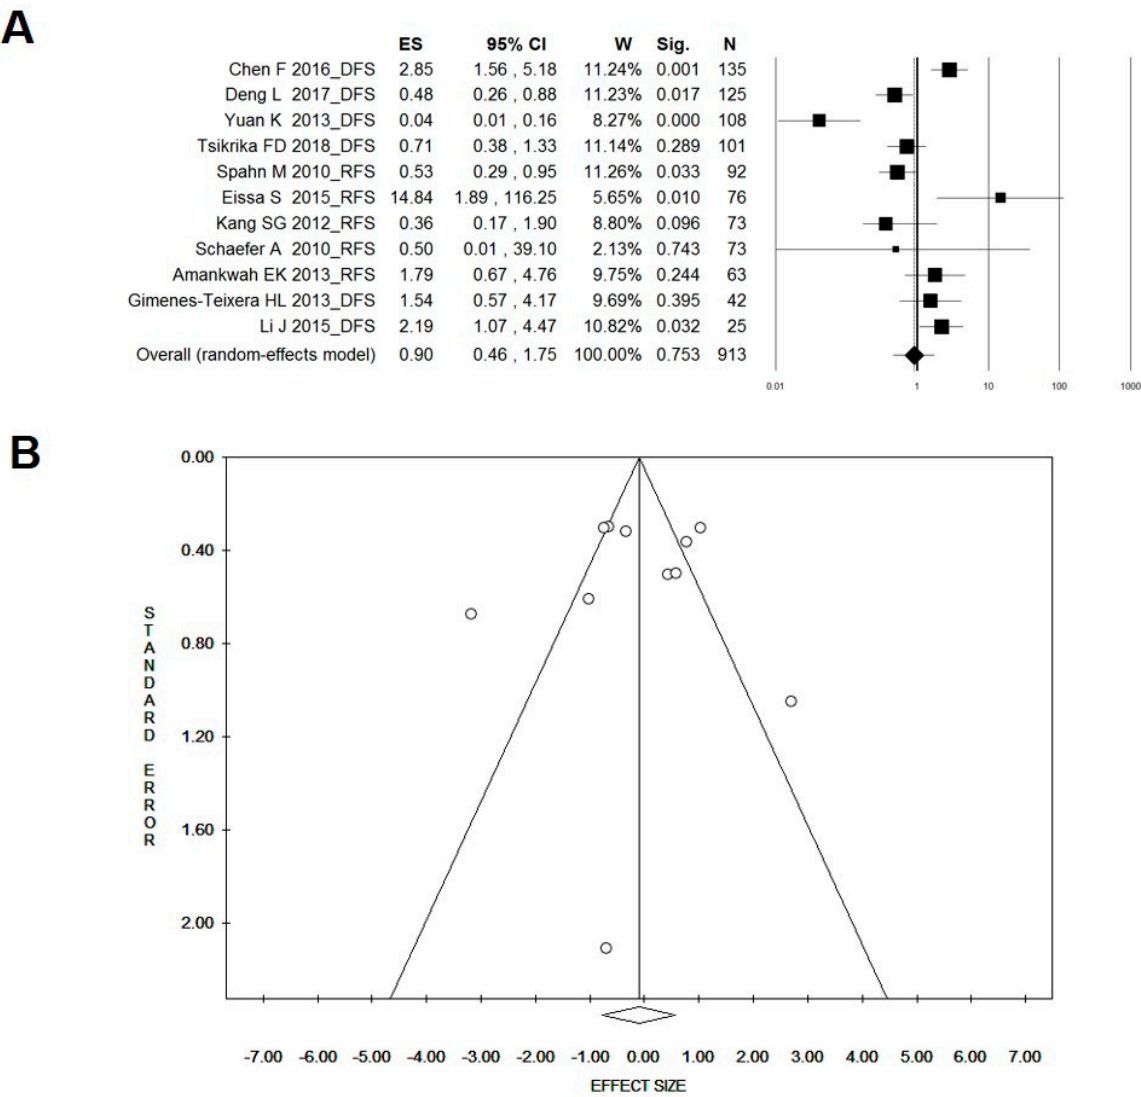

**Figure S3.** Forest (A) and Funnel (B) plots for the effect of miR-221 overexpression on DFS/RFS. ES, effect size (i.e., hazard ratio); W, weight; Sig, statistical significance; N, total number of cancer patients included in the survival analysis.

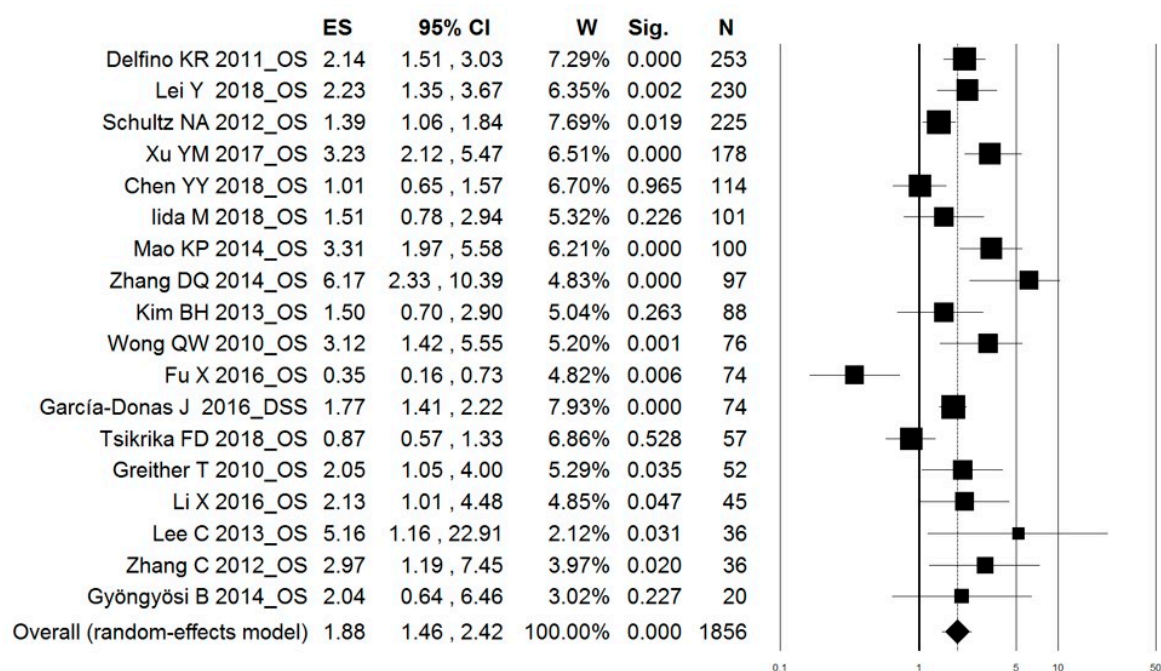

**Figure S4.** Forest plots for the effect of miR-222 overexpression and OS/DSS

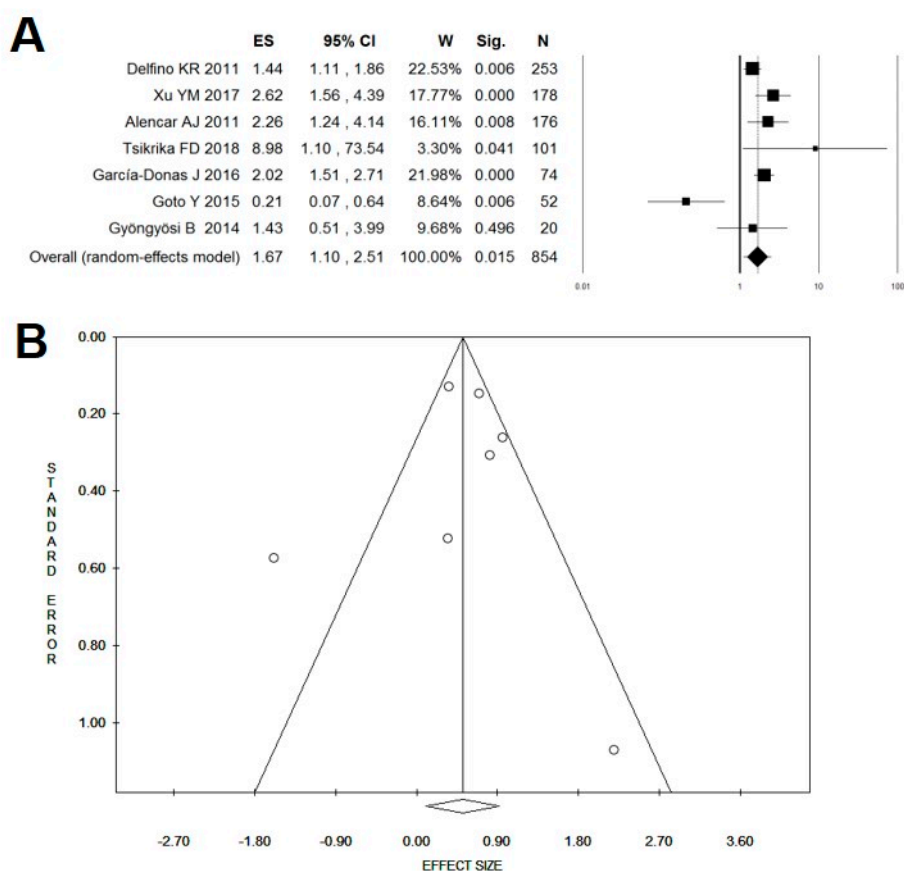

**Figure S5.** Forest (A) and Funnel (B) plots for the effect of miR-222 overexpression on progression-free survival. ES, effect size (i.e., hazard ratio); W, weight; Sig, statistical significance; N, total number of cancer patients included in the survival analysis.

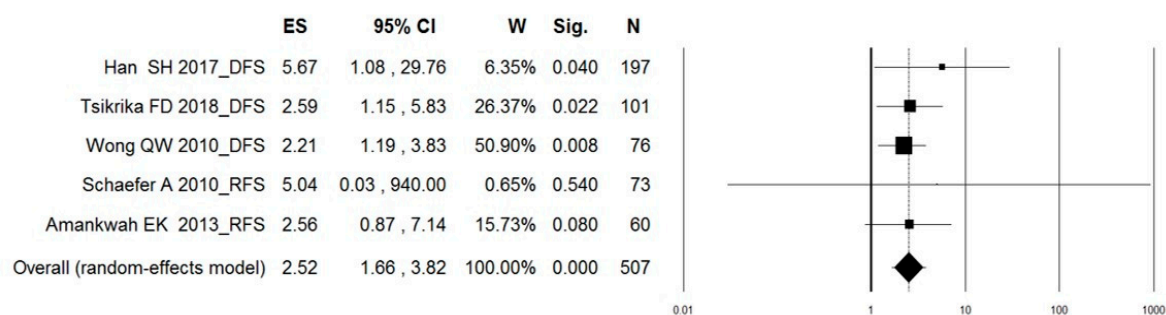

Figure S6. Forest plots for the effect of miR-222 overexpression and RFS/DFS

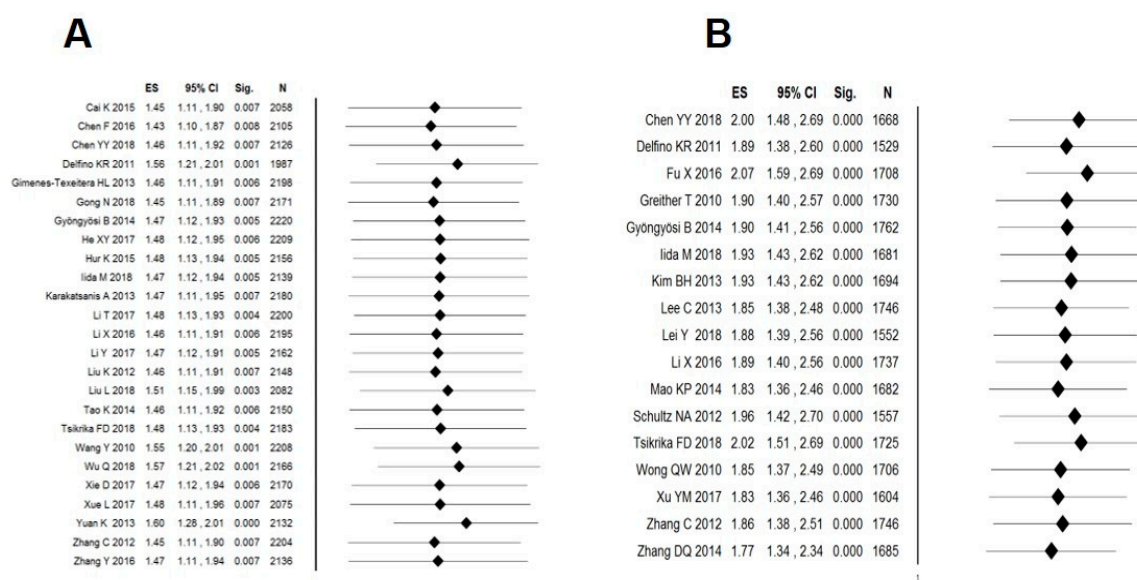

Figure S7. Sensitivity analysis of the meta-analysis for miR-221 (A) and miR-222 (B)

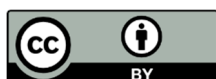

© 2019 by the authors. Licensee MDPI, Basel, Switzerland. This article is an open access article distributed under the terms and conditions of the Creative Commons Attribution (CC BY) license (<http://creativecommons.org/licenses/by/4.0/>).
